# Supplementary material for: Synthesis, characterization and disorder–order phase transition of inorganic–organic hybrid materials (H2dabco-CH2-Cl)[MIICl4] (M = Co, Zn)
Source: Royal Society of Chemistry journal article supplement (doi:10.1039/c5ce02059j), 2015-12-03
Supplement: c5ce02059j1.pdf [file c5ce02059j1.pdf]

## Supporting Information

### **Synthesis, characterization and disorder-order phase transition of inorganic-organic hybrid materials (H<sub>2</sub>dabco-CH<sub>2</sub>-Cl)[M<sup>II</sup>Cl<sub>4</sub>] (M = Co, Zn)**

**Chun-Hong Chen, Guan-Cheng Xu\***

Key Laboratory of Energy Materials Chemistry (Xinjiang University), Ministry of Education. Key Laboratory of Advanced Functional Materials, Autonomous Region. Institute of Applied Chemistry, Xinjiang University, Urumqi, 830046 Xinjiang, PR China.

Table S1 Hydrogen bonds for (H<sub>2</sub>dabco-CH<sub>2</sub>-Cl)[CoCl<sub>4</sub>] and (H<sub>2</sub>dabco-CH<sub>2</sub>-Cl)[ZnCl<sub>4</sub>] at two temperatures

Fig. S1 IR spectra of (H<sub>2</sub>dabco-CH<sub>2</sub>-Cl)[CoCl<sub>4</sub>] (a) and (H<sub>2</sub>dabco-CH<sub>2</sub>-Cl)[ZnCl<sub>4</sub>] (b).

Fig. S2 PXRD patterns of (H<sub>2</sub>dabco-CH<sub>2</sub>-Cl)[CoCl<sub>4</sub>] (a) and (H<sub>2</sub>dabco-CH<sub>2</sub>-Cl)[ZnCl<sub>4</sub>] (b).

Fig. S3 TG curves of (H<sub>2</sub>dabco-CH<sub>2</sub>-Cl)[CoCl<sub>4</sub>] (a) and (H<sub>2</sub>dabco-CH<sub>2</sub>-Cl)[ZnCl<sub>4</sub>] (b).

Fig. S4 DSC curves of (H<sub>2</sub>dabco-CH<sub>2</sub>-Cl)[CoCl<sub>4</sub>] (a) and (H<sub>2</sub>dabco-CH<sub>2</sub>-Cl)[ZnCl<sub>4</sub>] (b) obtained in a heating-cooling mode at 5 K/min, 10 K/min, 15 K/min and 20 K/min, respectively.

Fig. S5 The antiparallel chains are connected by the hydrogen bonds to generate a 2D layers of (H<sub>2</sub>dabco-CH<sub>2</sub>-Cl)[CoCl<sub>4</sub>] (a) and (H<sub>2</sub>dabco-CH<sub>2</sub>-Cl)[ZnCl<sub>4</sub>] (b).

Table S1 Hydrogen bonds for (H<sub>2</sub>dabco-CH<sub>2</sub>-Cl)[CoCl<sub>4</sub>] and (H<sub>2</sub>dabco-CH<sub>2</sub>-Cl)[ZnCl<sub>4</sub>] at two temperatures

Hydrogen bonds of (H<sub>2</sub>dabco-CH<sub>2</sub>-Cl)[CoCl<sub>4</sub>] at 358 K

| D-H...A                   | d(D-H) (Å) | d(H...A) (Å) | d(D...A) (Å) | ∠(DHA) (°) |
|---------------------------|------------|--------------|--------------|------------|
| N2-H2...Cl2               | 0.83(5)    | 2.74(3)      | 3.349(4)     | 132(2)     |
| N2-H2...Cl2 <sup>a</sup>  | 0.83(5)    | 2.74(3)      | 3.349(4)     | 132(2)     |
| C1-H1...Cl3 <sup>b</sup>  | 0.98(5)    | 2.72(5)      | 3.635(6)     | 155(4)     |
| C1-H1...Cl3 <sup>c</sup>  | 0.98(5)    | 2.72(5)      | 3.635(6)     | 155(4)     |
| C5-H5A...Cl3 <sup>b</sup> | 0.97       | 2.76         | 3.630(4)     | 149        |

Symmetry transformations used to generate equivalent atoms: a = x, 1/2-y, z; b = 1+x, y, z; c = 1+x, 1/2-y, z.

Hydrogen bonds of (H<sub>2</sub>dabco-CH<sub>2</sub>-Cl)[CoCl<sub>4</sub>] at 100 K

| D-H...A                   | d(D-H) (Å) | d(H...A) (Å) | d(D...A) (Å) | ∠(DHA) (°) |
|---------------------------|------------|--------------|--------------|------------|
| N2-H2...Cl1 <sup>a</sup>  | 0.88(2)    | 2.57(2)      | 3.246(2)     | 134(1)     |
| N2-H2...Cl4 <sup>a</sup>  | 0.88(2)    | 2.78(2)      | 3.384(2)     | 127(1)     |
| N2-H2...Cl2 <sup>b</sup>  | 0.88(2)    | 2.79(2)      | 3.325(2)     | 120(1)     |
| C1-H1A...Cl2              | 0.99       | 2.79         | 3.651(2)     | 145        |
| C2-H2A...Cl2              | 0.99       | 2.70         | 3.584(2)     | 149        |
| C3-H3B...Cl1 <sup>b</sup> | 0.99       | 2.76         | 3.680(2)     | 156        |
| C4-H4B...Cl2              | 0.99       | 2.68         | 3.571(2)     | 150        |
| C5-H5A...Cl2 <sup>b</sup> | 0.99       | 2.79         | 3.444(2)     | 124        |
| C5-H5B...Cl3 <sup>c</sup> | 0.99       | 2.82         | 3.471(2)     | 124        |
| C6-H6A...Cl1 <sup>d</sup> | 0.99       | 2.74         | 3.492(2)     | 133        |
| C6-H6B...Cl4 <sup>c</sup> | 0.99       | 2.77         | 3.517(2)     | 133        |
| C7-H7A...Cl4 <sup>c</sup> | 0.99       | 2.76         | 3.506(2)     | 133        |
| C7-H7B...Cl1 <sup>d</sup> | 0.99       | 2.74         | 3.494(2)     | 133        |

Symmetry transformations used to generate equivalent atoms: a = x, y, 1+z; b = x, 1/2-y, 1/2+z; c = 1-x, -y, 1-z; d = 2-x, -y, 1-z.

Hydrogen bonds of (H<sub>2</sub>dabco-CH<sub>2</sub>-Cl)[ZnCl<sub>4</sub>] at 363 K

| D-H...A                  | d(D-H) (Å) | d(H...A) (Å) | d(D...A) (Å) | ∠(DHA) (°) |
|--------------------------|------------|--------------|--------------|------------|
| N2-H2...Cl1 <sup>a</sup> | 0.90(3)    | 2.68(17)     | 3.359(4)     | 132(14)    |
| N2-H2...Cl1 <sup>b</sup> | 0.90(3)    | 2.68(17)     | 3.359(4)     | 132(14)    |
| C1-H1A...Cl3             | 0.97(16)   | 2.80(17)     | 3.652(5)     | 149(15)    |
| C1-H1AC...Cl3            | 0.97(16)   | 2.74(17)     | 3.652(5)     | 156(15)    |
| C5-H5A...Cl3             | 0.96       | 2.78         | 3.639(3)     | 149        |

Symmetry transformations used to generate equivalent atoms: a = -1+x, y, z; b = -1+x, 3/2-y, z.

Hydrogen bonds of (H<sub>2</sub>dabco-CH<sub>2</sub>-Cl)[ZnCl<sub>4</sub>] at 100 K

| D-H...A                   | d(D-H) (Å) | d(H...A) (Å) | d(D...A) (Å) | ∠(DHA) (°) |
|---------------------------|------------|--------------|--------------|------------|
| N2-H2...Cl2 <sup>a</sup>  | 0.90(5)    | 2.51(5)      | 3.239(5)     | 139(5)     |
| N2-H2...Cl4 <sup>a</sup>  | 0.90(5)    | 2.77(6)      | 3.383(5)     | 127(5)     |
| C1-H1B...Cl1 <sup>b</sup> | 0.99       | 2.81         | 3.663(6)     | 144        |
| C2-H2B...Cl1 <sup>b</sup> | 0.99       | 2.69         | 3.576(6)     | 149        |
| C3-H3A...Cl2 <sup>c</sup> | 0.99       | 2.76         | 3.681(6)     | 156        |
| C4-H4A...Cl2 <sup>d</sup> | 0.99       | 2.76         | 3.499(6)     | 132        |
| C4-H4B...Cl4 <sup>e</sup> | 0.99       | 2.73         | 3.491(6)     | 134        |
| C5-H5A...Cl4 <sup>e</sup> | 0.99       | 2.77         | 3.512(6)     | 132        |
| C5-H5B...Cl2 <sup>d</sup> | 0.99       | 2.71         | 3.476(6)     | 134        |
| C6-H6A...Cl1 <sup>b</sup> | 0.99       | 2.68         | 3.568(6)     | 150        |
| C7-H7A...Cl1 <sup>c</sup> | 0.99       | 2.80         | 3.444(6)     | 124        |
| C7-H7C...Cl3 <sup>e</sup> | 0.99       | 2.82         | 3.466(6)     | 124        |

Symmetry transformations used to generate equivalent atoms: a = x, -1+y, 1+z; b = x, -1+y, z; c = x, 1/2-y, 1/2+z; d = 2-x, 1-y, 1-z; e = 1-x, 1-y, 1-z.

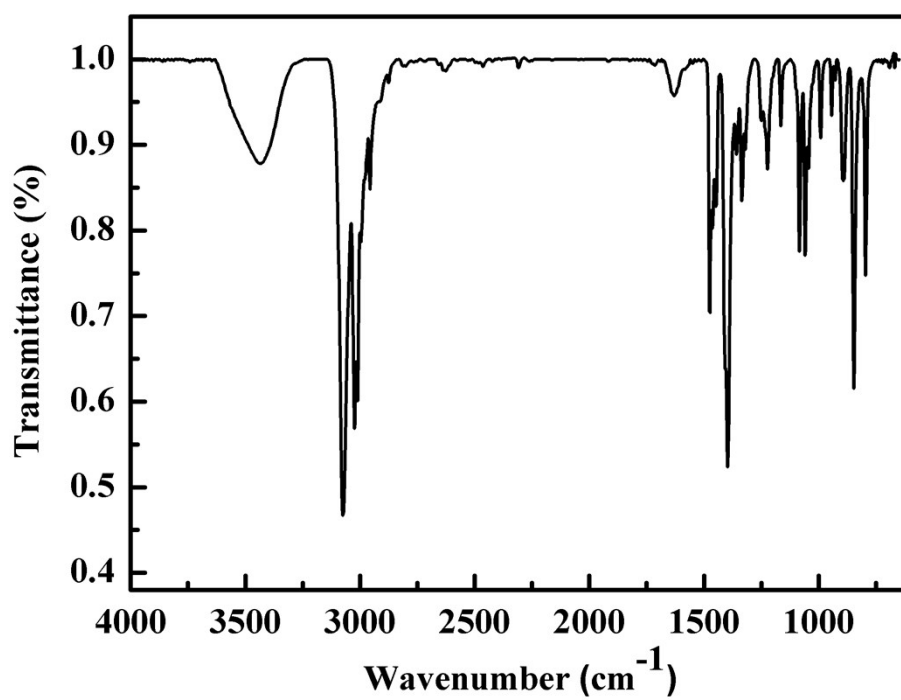

(a)

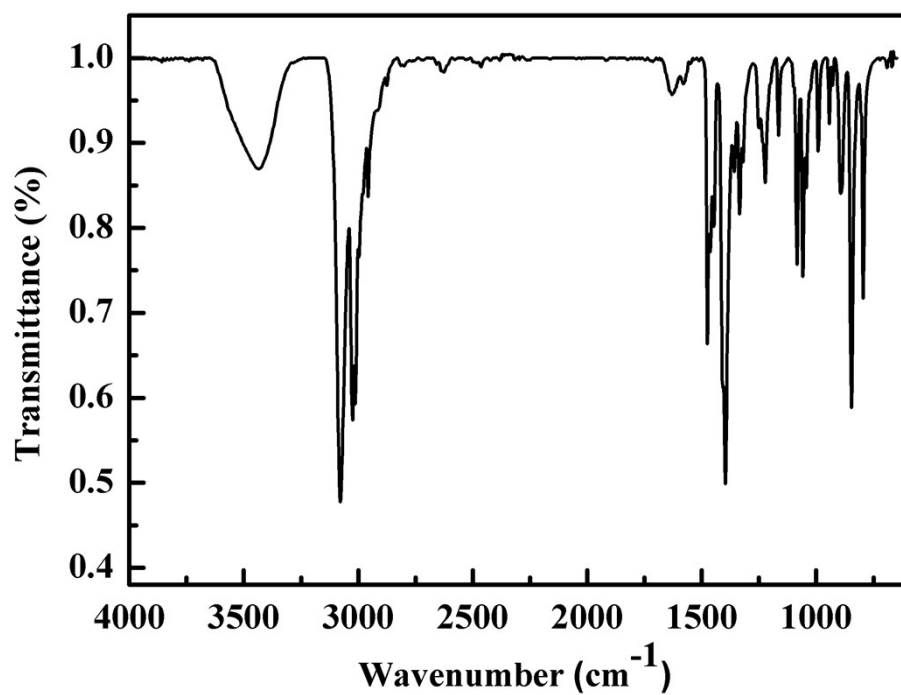

(b)

Fig. S1 IR spectra of (H<sub>2</sub>dabco-CH<sub>2</sub>-Cl)[CoCl<sub>4</sub>] (a) and (H<sub>2</sub>dabco-CH<sub>2</sub>-Cl)[ZnCl<sub>4</sub>] (b).

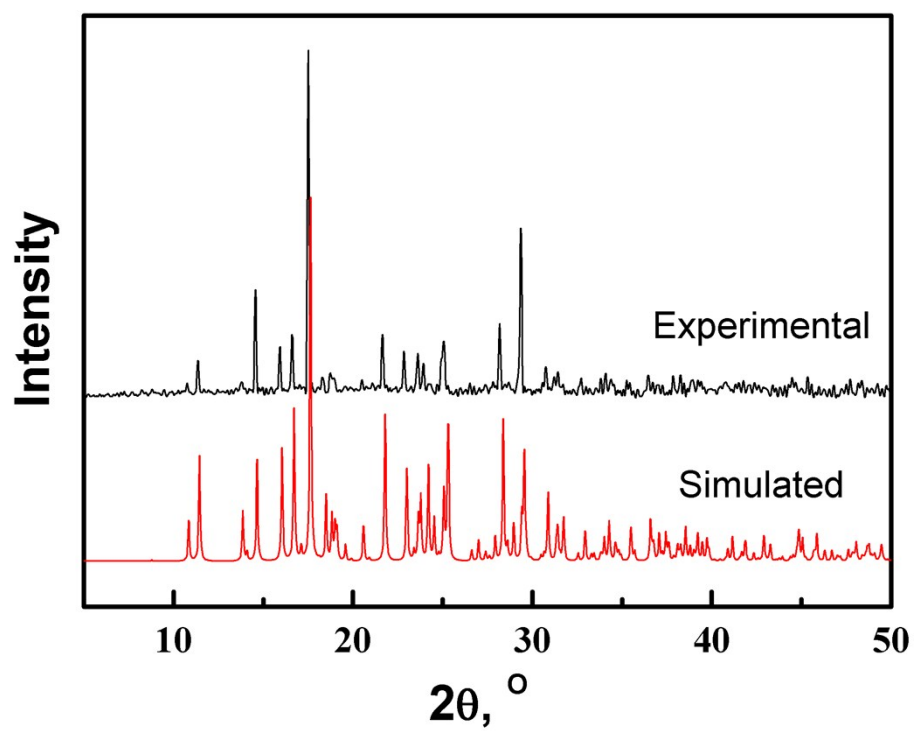

(a)

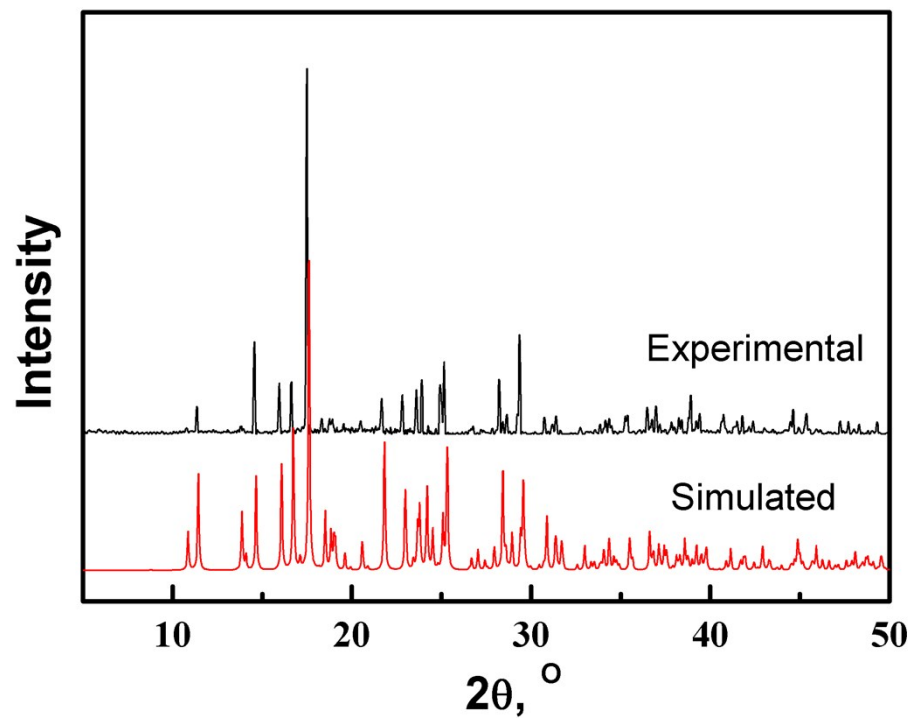

(b)

Fig. S2 PXRd patterns of  $(\text{H}_2\text{dabco-CH}_2\text{-Cl})[\text{CoCl}_4]$  (a) and  $(\text{H}_2\text{dabco-CH}_2\text{-Cl})[\text{ZnCl}_4]$  (b).

The TG curves of  $(\text{H}_2\text{dabco-CH}_2\text{-Cl})[\text{CoCl}_4]$  and  $(\text{H}_2\text{dabco-CH}_2\text{-Cl})[\text{ZnCl}_4]$  are shown in Fig. S3. Because the Cl element is harmful to the sample holder and thermocouple of the TG instrument, the TG measurements were stopped when the compounds begin to decompose.

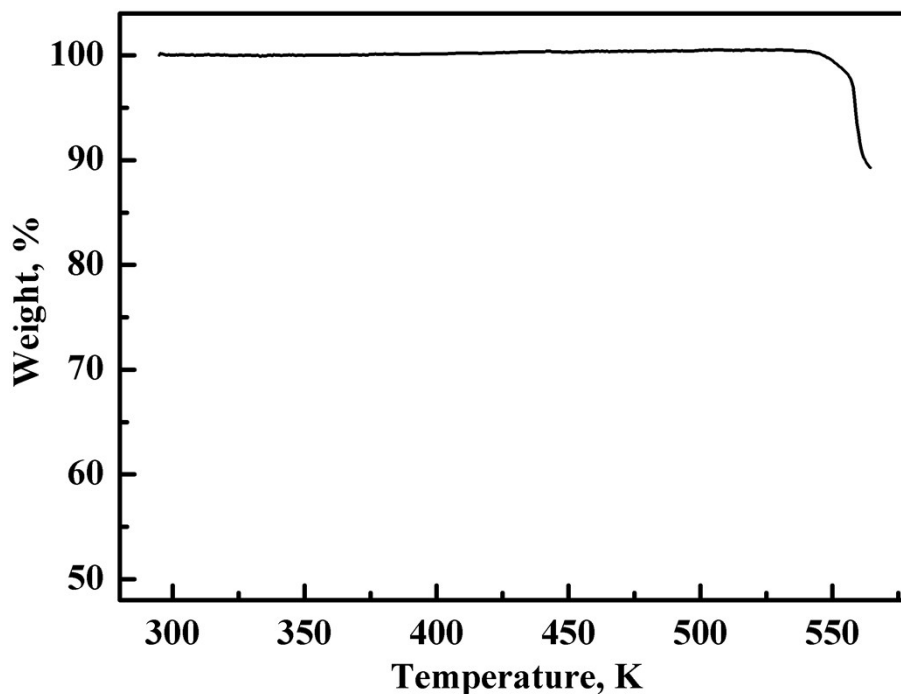

(a)

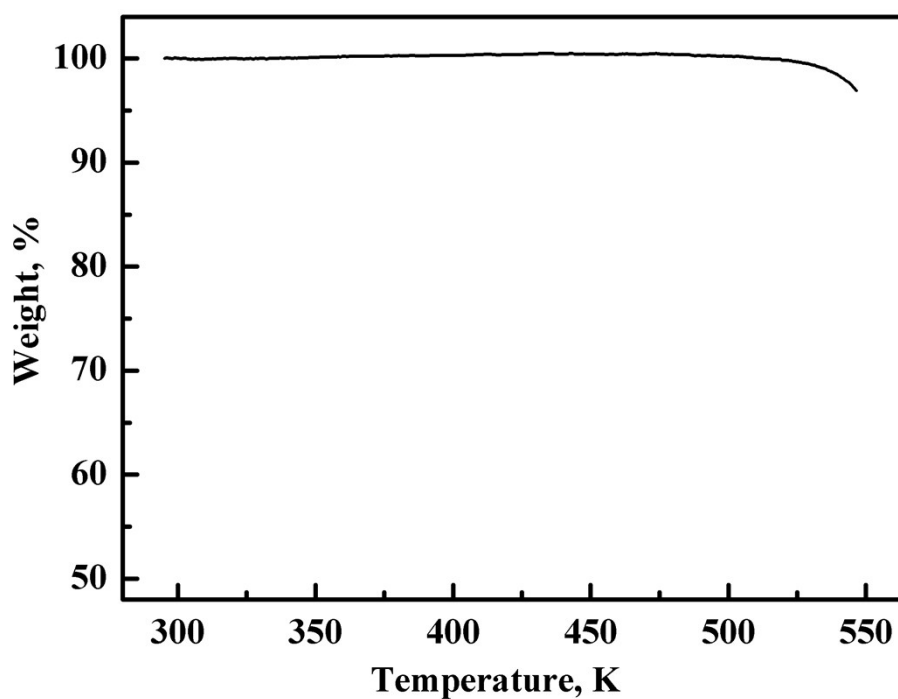

(b)

Fig. S3 TG curves of  $(\text{H}_2\text{dabco-CH}_2\text{-Cl})[\text{CoCl}_4]$  (a) and  $(\text{H}_2\text{dabco-CH}_2\text{-Cl})[\text{ZnCl}_4]$  (b).

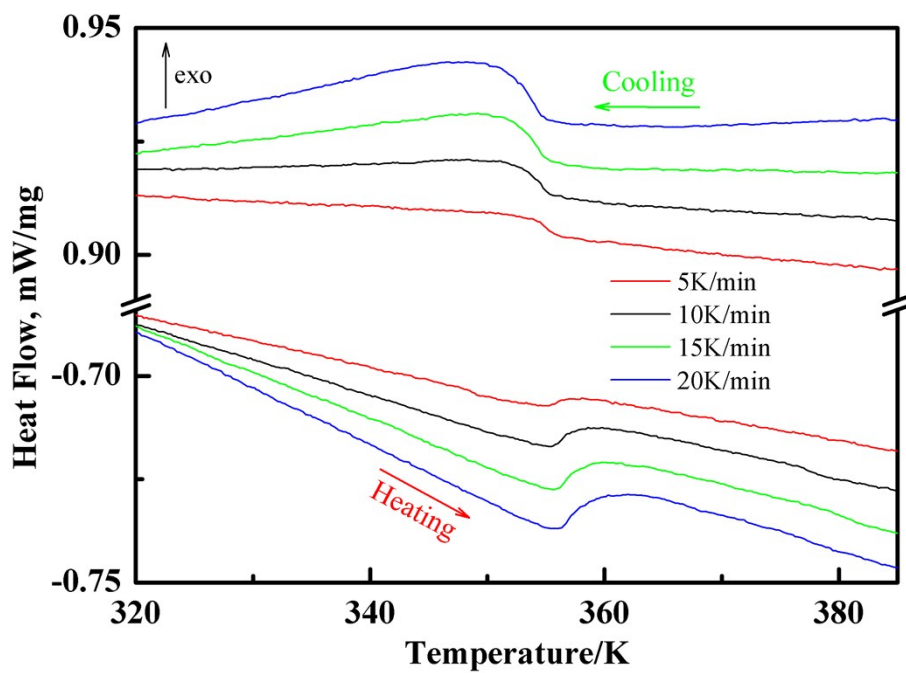

(a)

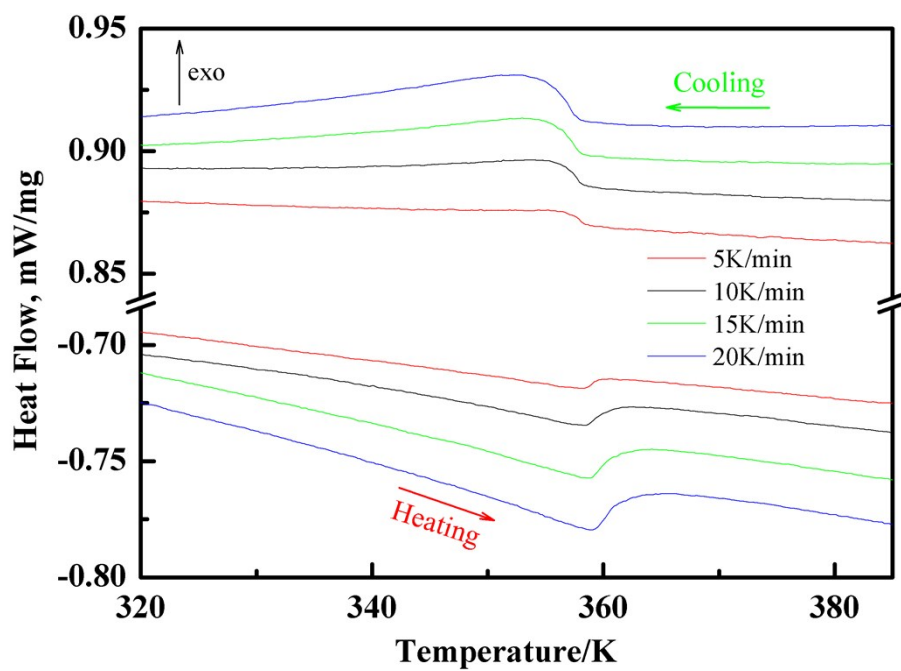

(b)

Fig. S4 DSC curves of  $(\text{H}_2\text{dabco-CH}_2\text{-Cl})[\text{CoCl}_4]$  (a) and  $(\text{H}_2\text{dabco-CH}_2\text{-Cl})[\text{ZnCl}_4]$  (b) obtained in a heating-cooling mode at 5 K/min, 10 K/min, 15 K/min and 20 K/min, respectively.

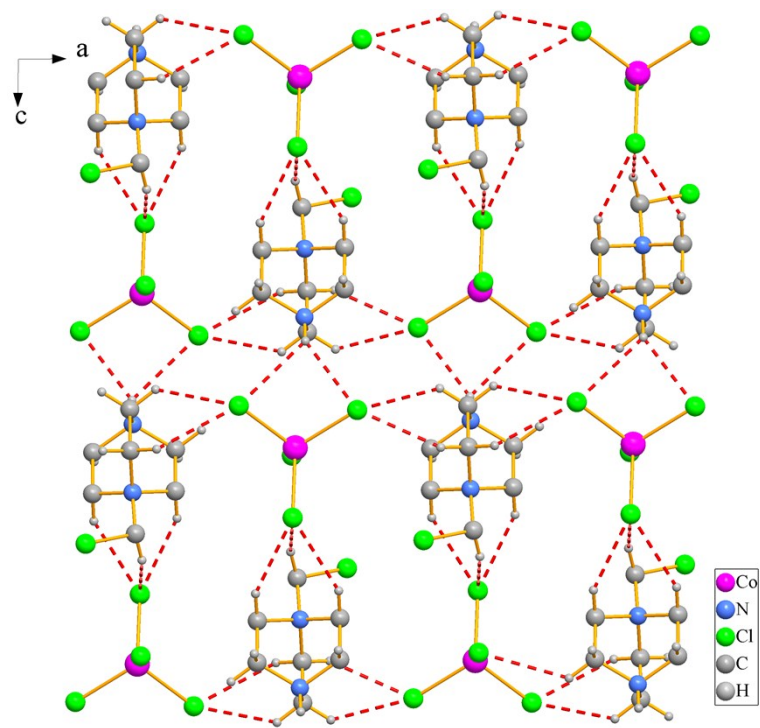

(a)

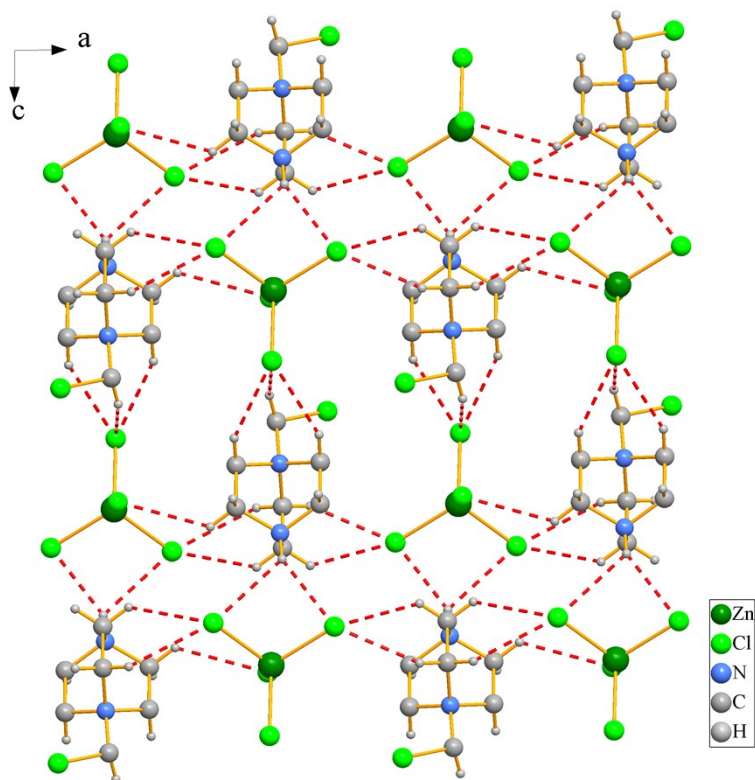

(b)

Fig. S5 The antiparallel chains are connected by the hydrogen bonds to generate a 2D layers of  $(\text{H}_2\text{dabco-CH}_2\text{-Cl})[\text{CoCl}_4]$  (a) and  $(\text{H}_2\text{dabco-CH}_2\text{-Cl})[\text{ZnCl}_4]$  (b).
